# Supplementary material for: Consequences of gamma-ray irradiation on structural and electronic properties of PEDOT:PSS polymer in air and vacuum environments
Source: Royal Society of Chemistry journal article supplement (doi:10.1039/d1ra03463d), 2021-01-01
Supplement: d1ra03463d1.pdf [file d1ra03463d1.pdf]

## Supplementary information

For

### **Consequences of gamma-ray irradiation on structural and electronic properties of PEDOT: PSS polymer under air and vacuum environments**

Aswin kumar Anbalagan <sup>a</sup>, Shivam Gupta <sup>b</sup>, Mayur Chaudhary <sup>b</sup>, Rishi Ranjan Kumar <sup>b</sup>, Yu-Lun Chueh <sup>b</sup>, Nyan-Hwa Tai <sup>b</sup> and Chih-Hao Lee <sup>a,c,\*</sup>

<sup>a</sup> Department of Engineering and System Science, National Tsing Hua University, Hsinchu, Taiwan, 30013

<sup>b</sup> Department of Materials Science and Engineering, National Tsing Hua University, Hsinchu, Taiwan, 30013

<sup>c</sup> Institute of Nuclear Engineering and Science, National Tsing Hua University, Hsinchu, Taiwan, 30013

\* Corresponding author: [chlee@mx.nthu.edu.tw](mailto:chlee@mx.nthu.edu.tw)

## Resistivity measurement

Figure S1 shows the resistivity change as a function of dose for PEDOT: PSS films irradiated in air and vacuum environment at 0, 500, 1000, 1500 and 3000 Gy, respectively.

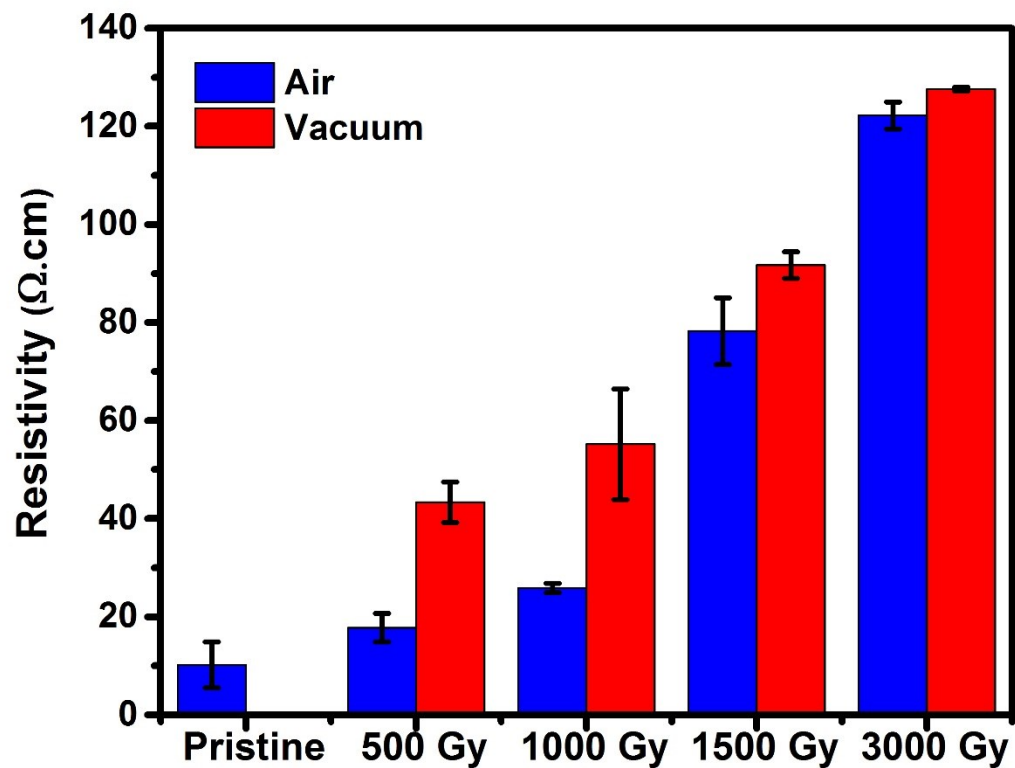

Figure S1. Resistivity change as a function of dose for the PEDOT: PSS films irradiated in air and vacuum environment.

## X-ray diffraction (XRD)

XRD studies revealed the amorphous nature of PEDOT: PSS films before and after irradiation in air and vacuum environment up to 3 kGy as shown in **Figure S2**.

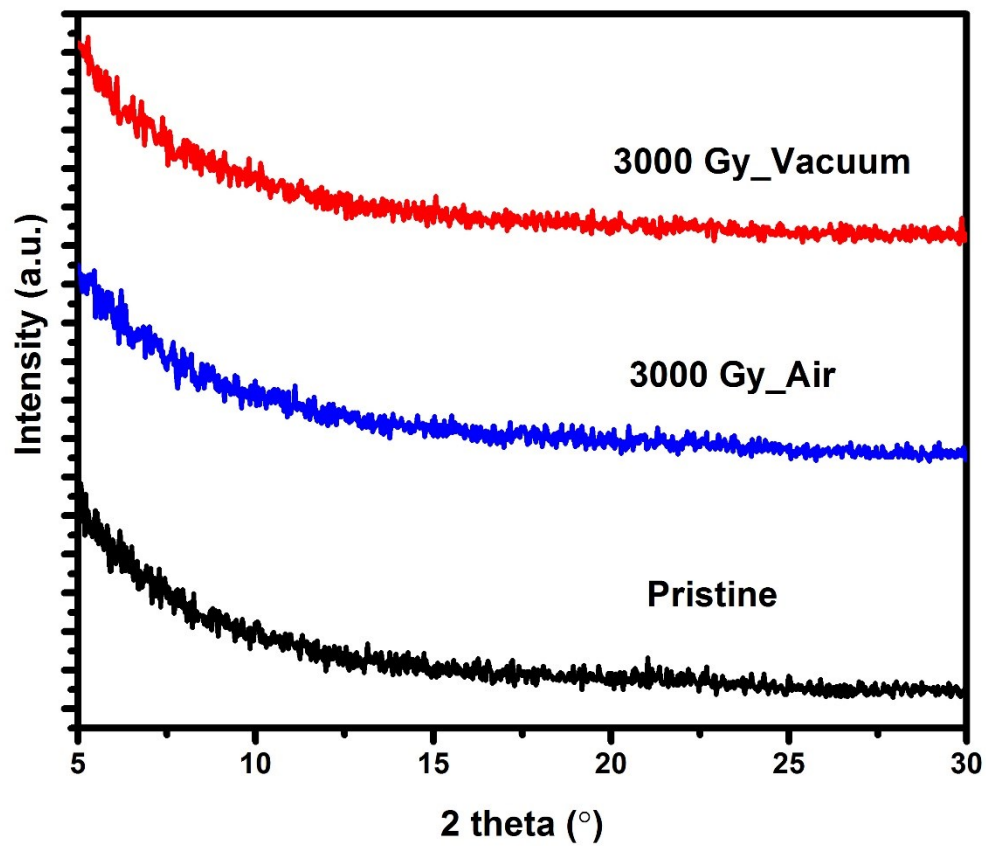

**Figure S2.** XRD of pristine and 3000 Gy gamma-irradiated PEDOT: PSS films in air and vacuum environment.

## Atomic Force Microscopy (AFM)

AFM was performed by tapping mode across  $10\ \mu\text{m} \times 10\ \mu\text{m}$  at various positions for pristine and irradiated samples at air and vacuum environments. **Figure S3** revealed no significant difference in the morphology of the samples before and after irradiation.

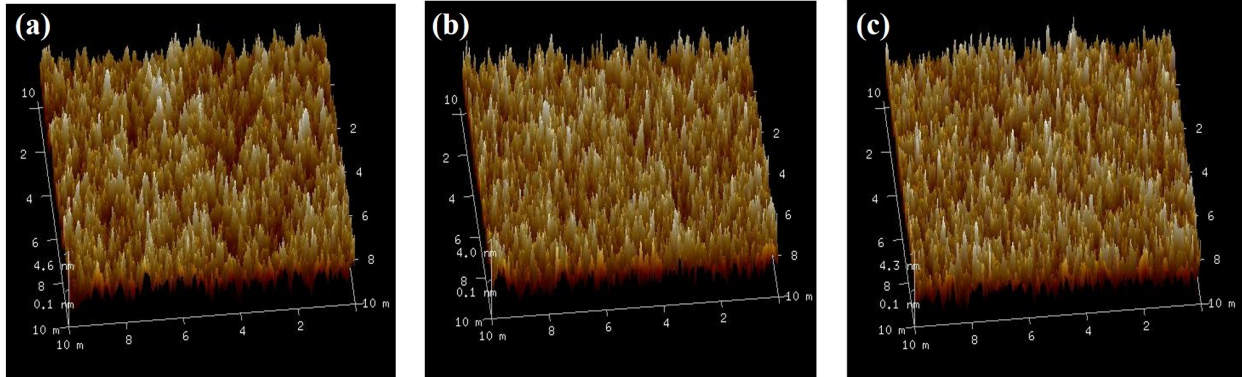

**Figure S3.** AFM topographies ( $10\ \mu\text{m} \times 10\ \mu\text{m}$ ) of: (a) Pristine and 3000 Gy irradiated PEDOT:PSS films: (b) in air and (c) vacuum environment.
